# Supplementary material for: In Situ Construction of Ag/TiO2/g-C3N4 Heterojunction Nanocomposite Based on Hierarchical Co-Assembly with Sustainable Hydrogen Evolution
Source: PubMed Central journal article supplement (PMC7022471; doi:10.3390/nano10010001), 2019-12-18
Supplement: nanomaterials-10-00001-s001.pdf [file nanomaterials-10-00001-s001.pdf]

## Supporting information

# In Situ Construction of Ag/TiO<sub>2</sub>/g-C<sub>3</sub>N<sub>4</sub> Heterojunction Nanocomposite Based on Hierarchical Co-Assembly with Sustainable Hydrogen Evolution

Rui Geng <sup>1,2</sup>, Juanjuan Yin <sup>2</sup>, Jingxin Zhou <sup>2,\*</sup>, Tifeng Jiao <sup>1,2,\*</sup>, Yao Feng <sup>2</sup>, Lexin Zhang <sup>2</sup>, Yan Chen <sup>2</sup>, Zhenhua Bai <sup>3</sup> and Qiuming Peng <sup>1</sup>

<sup>1</sup> State Key Laboratory of Metastable Materials Science and Technology, Yanshan University, Qinhuangdao 066004, China; gengrui@ipe.ac.cn (R.G.); pengqiuming@ysu.edu.cn (Q.P.)

<sup>2</sup> Hebei Key Laboratory of Applied Chemistry, School of Environmental and Chemical Engineering, Yanshan University, Qinhuangdao 066004, China; jjy1729@163.com (J.Y.); 15833965527@163.com (Y.F.); zhanglexin@ysu.edu.cn (L.Z.); chenyan@ysu.edu.cn (Y.C.)

<sup>3</sup> National Engineering Research Center for Equipment and Technology of Cold Strip Rolling, Yanshan University, Qinhuangdao 066004, China; bai\_zhenhua@aliyun.com

\* Correspondence: zhoujingxin@ysu.edu.cn (J.Z.); tfjiao@ysu.edu.cn (T.J.); Tel.: +86-335-806-1569 (J.Z.); +86-335-805-6854 (T.J.)

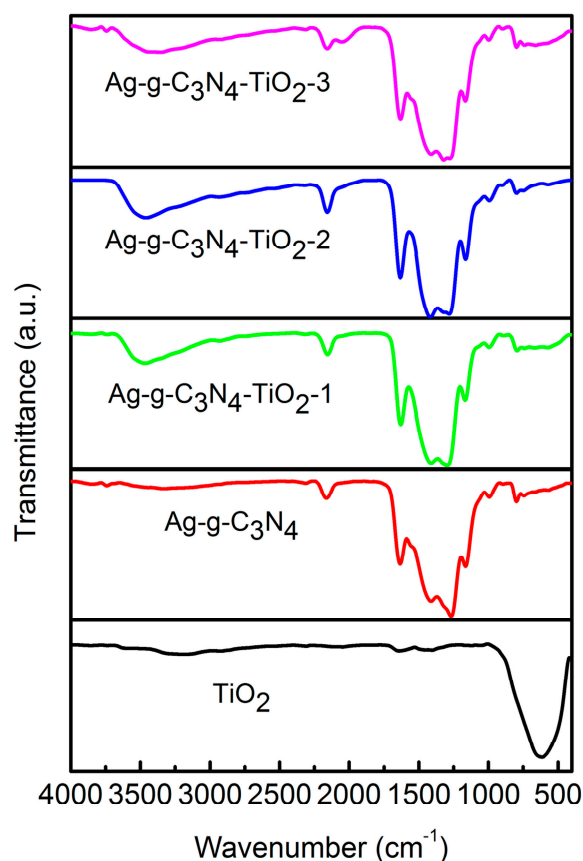

**Figure S1.** FT-IR spectra of TiO<sub>2</sub>, Ag/g-C<sub>3</sub>N<sub>4</sub>, Ag/TiO<sub>2</sub>/g-C<sub>3</sub>N<sub>4</sub>-1, Ag/TiO<sub>2</sub>/g-C<sub>3</sub>N<sub>4</sub>-2, Ag/TiO<sub>2</sub>/g-C<sub>3</sub>N<sub>4</sub>-3.

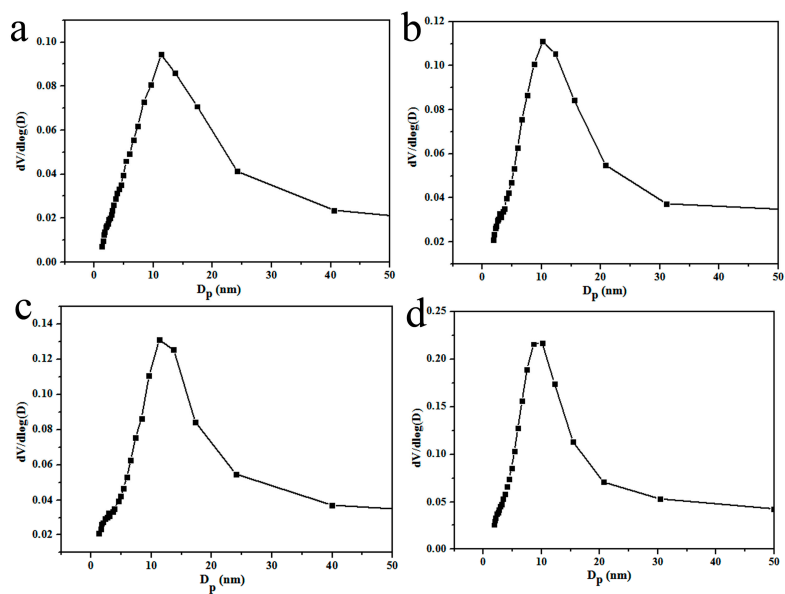

**Figure S2.** The typical BJH pore-size distribution curves: (a) Ag/g-C<sub>3</sub>N<sub>4</sub>; (b) Ag/TiO<sub>2</sub>/g-C<sub>3</sub>N<sub>4</sub>-1; (c) Ag/TiO<sub>2</sub>/g-C<sub>3</sub>N<sub>4</sub>-2; (d) Ag/TiO<sub>2</sub>/g-C<sub>3</sub>N<sub>4</sub>-3.

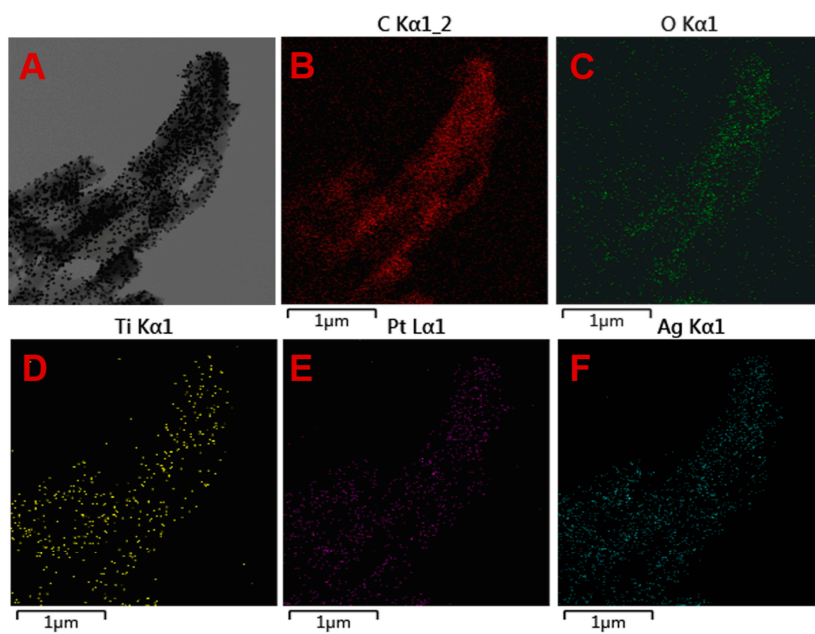

**Figure S3.** TEM image (A) and Elemental mapping images (B-F) of the photodeposited Ag/TiO<sub>2</sub>/g-C<sub>3</sub>N<sub>4</sub>-2.
